# Social cognition and the anterior temporal lobes: a review and theoretical framework

Ingrid R. Olson,<sup>1</sup> David McCoy,<sup>1</sup> Elizabeth Klobusicky,<sup>1</sup> and Lars A. Ross<sup>2,3</sup>

<sup>1</sup>Department of Psychology, Temple University, Philadelphia, PA 19122, USA, <sup>2</sup>The Derner Institute of Advanced Psychological Studies, Adelphi University, Garden City, NY 11530, USA and <sup>3</sup>The Sheryl and Daniel R. Tishman Cognitive Neurophysiology Laboratory, Albert Einstein College of Medicine, 1225 Morris Park Avenue, New York, NY 10461, USA

**Memory for people and their relationships, along with memory for social language and social behaviors, constitutes a specific type of semantic memory termed *social knowledge*. This review focuses on how and where social knowledge is represented in the brain. We propose that portions of the anterior temporal lobe (ATL) play a critical role in representing and retrieving social knowledge. This includes memory about people, their names and biographies and more abstract forms of social memory such as memory for traits and social concepts. This hypothesis is based on the convergence of several lines of research including anatomical findings, lesion evidence from both humans and non-human primates and neuroimaging evidence. Moreover, the ATL is closely interconnected with cortical nuclei of the amygdala and orbitofrontal cortex via the uncinate fasciculus. We propose that this pattern of connectivity underlies the function of the ATL in encoding and storing emotionally tagged knowledge that is used to guide orbitofrontal-based decision processes.**

**Keywords:** semantic memory; social cognition; person memory; famous faces; social networks; theory of mind; temporal pole

## INTRODUCTION

There is little doubt that the special status of human beings among living creatures is strongly related to our outstanding ability to organize our behavior with other members of our own species and that this ability is afforded to us by unique attributes of our brains. One of the central questions of social neuroscience is whether our brains are specifically adapted to process social information or whether mechanisms involved in non-social processes are sufficient to explain this ability. Social processes are often complex and can involve a wide variety of domains, such as face perception and emotional regulation, all of which have been intensively studied within the nascent field of social neuroscience over the past two decades. However, little is known about the database of stored information about social words, social behaviors and social entities, or in other words, that which constitutes social knowledge. Social knowledge can be considered a type of *semantic memory*, gained by experience and instruction, that is used to interpret others' social behavior and to express and comport ourselves socially.

To understand how the brain represents social knowledge, it is important to consider whether this represents a special, or privileged, category of semantic information. It has been proposed that evolutionary pressures have led to the categorical organization in the brain of a small number of knowledge types, such as living things (animals and plants) and artifacts (Caramazza and Shelton, 1998). This argument is based on the idea that survival and reproductive fitness are improved by the ability to recognize, understand and communicate to others information about some categories of information. One can assume that the most basic knowledge categories that would improve fitness would be food and predator information. Evidence for this view is found in cases of patients with focal lesions who show specific performance dissociations between living things and artifacts (Caramazza and Shelton, 1998). The ability to distinguish close exemplars of a

particular type and assign meaning to them may have its roots in evolutionary pressures to distinguish similar items that enhance (or diminish) survival and reproduction.

For social animals, information about other people and our relationships with them is of tantamount importance for mating and survival. The processing requirements in this case are quite different than that required to tell one animal apart from another since social knowledge is highly multimodal (e.g. what someone looks and sounds like), emotional (e.g. whether or not you like the person and what they mean to you), and is associated with both episodic and semantic memories (e.g. memories of shared experiences and biographic information). This review focuses on one part of the brain that has an important role in representing social knowledge: the anterior temporal lobe (ATL). This hypothesis is based on the convergence of several lines of research, reviewed later.

## EVIDENCE THAT THE ATLS HAVE A SOCIAL FUNCTION

### Anatomy of the ATL

The first piece of indirect evidence linking the ATL to social cognition is anatomical. As we will see, its location and connectivity are suitable for processing social and mnemonic information.

The ATL includes the temporal pole and anterior extents of the perirhinal (BA 35 and 36) and entorhinal cortices, along with the anterior portion of the fusiform, inferior, middle and superior temporal gyri. As such, it is very unlikely that the entire region has one unified function (Martin, 2009; Simmons and Martin, 2009). Superior aspects of the ATL are adjacent to the insula and inferior frontal gyrus. Medial aspects are contiguous with the amygdala and hippocampal input structures, entorhinal and perirhinal cortices. Moreover, the temporal portion of the human olfactory cortex, pyriform cortex, is found on the medial surface of the temporal pole (Allison, 1954; Price, 1990; Ding *et al.*, 2009). However, the precise demarcation of the temporal pole and its extent is ambiguous with regard to most temporal lobe structures. von Economo (1929) remarked that its boundary is 'always a gradual one, and not at all distinctly marked'; cited in Ding *et al.* (2009). The ATL is a transitional region where many different cortical regions meet.

Received 24 July 2012; Accepted 1 October 2012

Advance Access publication 9 October 2012

This work was supported by a National Institute of Health grant (R01MH091113) to I.R.O. The content is solely the responsibility of the authors and does not necessarily represent the official views of the National Institute of Mental Health or the National Institutes of Health.

Correspondence should be addressed to Ingrid R. Olson, Department of Psychology, Temple University, 1701 N. 13th Street, Philadelphia, PA 19122, USA. E-mail: iolson@temple.edu

Insight into the functionality of the ATL, and more specifically, the temporal pole, can be gleaned by examining the connectivity of the major subdivisions: dorsal and ventral ATL (see Figure 1). The dorsal ATL is mainly interconnected with the medial frontal cortex with some connectivity to orbital regions (BAs 10m, 10o, 11m, 13a, 14c, 14r, 25 and 32) (Kondo *et al.*, 2003). It receives its primary input from auditory processing centers in posterior superior temporal sulcus (STS) (Ding *et al.*, 2009; Blaizot *et al.*, 2010). In contrast, the ventral ATL is interconnected with the orbitofrontal cortex (BAs 11l, 13b, 13l and 13m) (Morecraft *et al.*, 1992). The ventral pathway receives its input from visual processing regions of the inferior temporal cortex (Ding *et al.*, 2009; Blaizot *et al.*, 2010).

The ATL also projects to entorhinal cortex, perirhinal cortex and parahippocampal cortex, which are closely aligned with episodic memory functions of the hippocampus (Insausti *et al.*, 1987; Moran *et al.*, 1987; Suzuki and Amaral, 1994) reviewed by Blaizot *et al.* (2010). It has been noted that in human primates, the pattern of connectivity of the ATL bears striking similarity to that of the amygdala (Mesulam, 2000; Kondo *et al.*, 2003, 2005). Indeed, the ATL is highly interconnected with both the amygdala and orbital frontal cortex and is therefore often referred to as a paralimbic region (Mesulam, 2000). Ghashghaei and Barbas (2002) investigated the anatomical connectivity of the ATL, amygdala and orbitofrontal cortex. They reported that the orbitofrontal cortex has bidirectional connections with the amygdala and that these connections were found in a dense U-shaped pattern in the basal lateral nucleus of the amygdala. Auditory and visual association regions in the ATL (e.g. dorsal and ventral ATL) also sent projections to the amygdala. Interesting, the ATL projection sites were in the same territory of the amygdala as the axons from orbitofrontal

cortex; significant overlap was found in both the basal lateral and basal medial nuclei (Ghashghaei and Barbas, 2002). These nuclei are known to have a role in emotional memory such as fear conditioning (Pickens *et al.*, 2003).

A large hook-shaped white matter tract, the uncinate fasciculus, links the ATL (anterior BA 20 and 38) and nearby BA 28 (entorhinal cortex) and BA 36 (parahippocampal cortex) to the cortical nuclei of the amygdala and to orbitofrontal cortex. The uncinate is one of the long-fiber association pathways. The function of the uncinate is not known, although it is affected in some psychiatric and neurological diseases (McIntosh *et al.*, 2008; Craig *et al.*, 2009). This white matter tract has an unusually protracted development, being one of the last to finish myelinating (Craig *et al.*, 2009).

The ATL's proximity to orbital regions causes it to be damaged in the same traumatic accidents that affect ventral prefrontal cortex. Its proximity to the amygdala causes it to be affected by some of the same incidents that affect this region and the neighboring hippocampus, such as herpes encephalitis. Moreover, temporal lobe resection surgery, used to treat intractable epilepsy, typically entails removal of the amygdala and anterior hippocampus, along with the ATL. As such, structure–function relationships detailed in many neuropsychological reports on the effects of orbitofrontal or amygdala lesions on social cognition must be viewed cautiously as the ATL is frequently damaged as well.

#### Damage to the ATLs causes changes in social behavior

The second line of evidence linking the ATL to social cognition comes from ablation studies. Monkeys with surgical bilateral lesions of the ATL, excluding the amygdala, exhibit grossly abnormal social behavior.

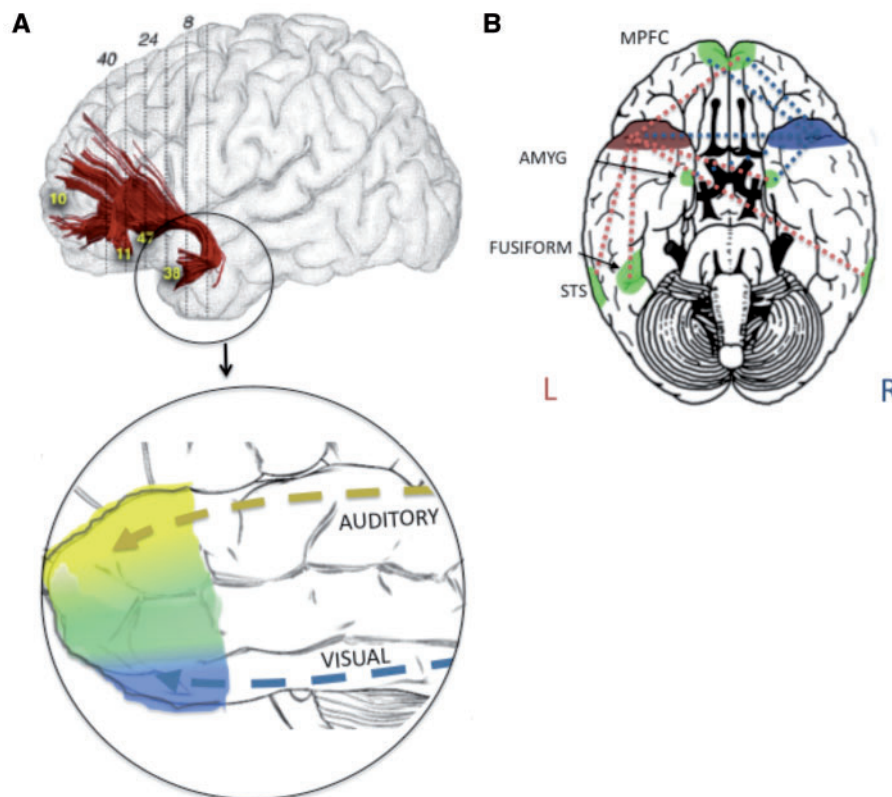

**Fig. 1** (A) An illustration of a major association fiber pathway, the uncinate fasciculus, which connects the ATL with orbital and medial aspects of the frontal lobe (used with permission from de Schotten *et al.*, 2012). Below this is a depiction of the sensory sensitivity of the ATL. Yellow = auditory sensitive cortex; blue = visual sensitive cortex (which continues on the inferior surface); green = multisensory sensitive cortex. (B) Functional connectivity of the ATL during processing of abstract person information in the form of sentences about people (depicted based on the data of (Simmons *et al.*, 2010)). mPFC, medial prefrontal cortex; amyg, amygdala.

They do not produce appropriate social signals (vocal or facial), nor do they appear to recognize the social signals of peer monkeys. They show little social interest in their peers, and at times are rejected from their social group. They are tame and show little aggression toward peer monkeys when provoked. Those with babies were neglectful and often violent toward them, causing consternation among other female monkeys. Some, but not all, of these social problems improved over time (Bucher *et al.*, 1970; Myers and Swett, 1970; Franzen and Myers, 1973; Myers, 1975; Kling and Steklis, 1976; Kling *et al.*, 1993). Orbitofrontal and amygdala lesions lead to a similar pattern of behavior, underscoring the tight coupling of the ATL to these regions. In contrast, lesions to posterior temporal cortex (area IT) and the anterior cingulate cause no social problems. These findings have been replicated in several species of monkeys, suggesting that there is evolutionary conservation of structure-function in the ATL across non-human primate species (reviewed in Olson *et al.*, 2007). It is difficult to understand the functionality of the ATL cortex, apart from its connections, based on this evidence alone, however. Surgical removal of the ATLs would necessarily damage the fibers connecting it to limbic regions of the brain, and thus, might damage the function of those regions as well.

Focal bilateral ATL lesions are rare in humans, although there are two instances of *somewhat* focal bilateral lesions. One rare disorder is Kluver-Bucy Syndrome, first discovered in monkeys, which is characterized by at least three of these symptoms: docility, hyperphagia, hyperorality, hypersexuality and visual agnosia with hypoemotionality (Kluver and Bucy, 1937). It was first reported in humans in the 1950s following bilateral anterior and medial temporal lobectomy surgery for epilepsy (Terzian and Dalle Ore, 1955). Since that time, case reports indicate that partial or complete Kluver-Bucy arises from a diverse set of disorders—surgical brain lesions, encephalitis, degenerative diseases of the brain and trauma (Gerstenbrand *et al.*, 1983) all of which commonly damage the anterior and medial temporal lobes. At times, partial Kluver-Bucy has been reported to follow focal unilateral ATL damage (Ghika-Schmid *et al.*, 1995) although some of the symptoms such as hypersexuality should be attributed to ATL disconnection from the amygdala and hypothalamus (Kling *et al.*, 1993). The one symptom that we will return to later in the paper is hypoemotionality to visual stimuli.

A second disorder that can affect bilateral ATLs is called frontotemporal dementia (FTD). FTD is a progressive disease characterized by a somewhat rapid degeneration of frontal and/or ATL tissue that, in its early stages, is left or right lateralized, frontal or temporal localized. Temporal damage is most evident in anterior regions, while more medial regions, such as the hippocampus, remain intact at early stages of the disease. Patients with the ‘behavioral variant’ of FTD (bv-FTD), usually associated with right ATL and/or frontal atrophy, exhibit striking social and emotional problems. These patients exhibit fixed facial expressions and dramatic changes in personality, making social interactions uncomfortable for both strangers and family members (Mychack *et al.*, 2001). Social problems include bizarre changes in dress and preferences and loss of manners and social graces (reviewed in Olson *et al.*, 2007). These changes in personality and social conduct relative to premorbid state are core diagnostic features of FTD (Neary *et al.*, 1998). Mendez *et al.* (2006) described an illustrative case:

A 71-year-old right-handed woman presented with a 2-year history of gradual and progressive personality change characterized by increasingly outgoing and disinhibited behavior. Her family complained that she approached strangers and initiated conversations, sometimes kissing them in greeting, and rubbing their arms. At one point, she was found sitting on a stranger’s lap. She became flip, lighthearted, and silly with frequent laughter and an increased preference for cartoons . . . she commented on her sex

life and that of her adolescent granddaughter, raising her blouse, touching her granddaughter’s breasts, using foul language, and burping or spitting in front of others.

A positron emission tomography (PET) scan showed bilateral ATL hypoperfusion, worse on the left (Mendez *et al.*, 2006). This detailed case report is reminiscent of Franzen and Myers’ (1973) study of rhesus monkeys with bilateral ATL lesions who indiscriminately approached and initiated contact with other monkeys, regardless of rank.

Another variant of FTD, termed semantic dementia, is associated with somewhat left-lateralized anterior, lateral and ventral temporal lobe damage. Patients with this disorder have progressive semantic deficits that are characterized by amodal receptive and expressive semantic deficits, usually assessed by confrontation naming. These deficits are observed in response to a wide variety of stimuli and across a variety of domains (Rogers *et al.*, 2006; Patterson *et al.*, 2007). Behavioral problems are also common in semantic dementia (Bozart *et al.*, 2000).

One must bear in mind that in humans with bv-FTD or semantic dementia, it is difficult to attribute social deficits strictly to the ATL. FTD is caused by widespread cellular loss, most prominently in orbitofrontal cortex and the ATLs (Hodges and Patterson, 2007), and also extending into lateral, medial and interior portions of the temporal lobe (Mion *et al.*, 2010). Many of the changes in personality experienced by patients with bv-FTS have been correlated with frontal lobe pathology (Edwards-Lee *et al.*, 1997; Rankin *et al.*, 2003; Sollberger *et al.*, 2009) although interestingly, changes in affiliative traits, such as interpersonal warmth, empathy and extraversion, are associated with right ATL pathology (Edwards-Lee *et al.*, 1997; Rankin *et al.*, 2003; Sollberger *et al.*, 2009). Related to this, a recent study reported that the personality trait of seeking and enjoying social relationships correlated with increased gray matter in the inferior ATL (Lebreton *et al.*, 2009). Also, a recent study investigated regions of atrophy related to social impairments in bv-FTD and found that impairments in the identification of sarcasm and emotion in video vignettes was associated with atrophy in the right temporal pole, as well as lateral orbitofrontal cortex, insula and the amygdala (Kipps *et al.*, 2009). The social deficits that accompany FTD go beyond personality changes to include changes that can plausibly be linked to social knowledge deficits: inappropriate dress, loss of social graces and loss of knowledge about context-appropriate behavior, including appropriate emotional responses.

### The ATLs are critical for person memory

The third line of evidence linking the ATL to social cognition comes from studies of person memory. Memory for who people are, and their social and emotional significance is essential for delineating the social environment and for forming and maintaining group cohesion. It is the glue that binds people together in a social group. A large number of findings converge to show that a region of the ventral ATL plays a critical role in person memory.

One of the earliest neuroimaging studies of face processing reported PET activations in the ATL to personally familiar and famous faces (Sergent *et al.*, 1992). Since that time dozens of functional magnetic resonance imaging (fMRI) studies have shown that the human ATL is particularly sensitive to personally familiar or famous faces as compared with unfamiliar faces (see Table 1). The ATL is acutely sensitive to different types of familiarity manipulations: responsiveness is enhanced by knowledge-base familiarity in the form of semantic knowledge (Nieuwenhuis *et al.*, 2011; Ross and Olson, 2012) but decreased by perceptual familiarity in the form of stimulus repetition (Sugiura *et al.*, 2001; Sugiura *et al.*, 2011).

The results of our meta-analysis of fMRI studies of person memory using the activation likelihood estimation (ALE; Turkeltaub *et al.*, 2002) are depicted in Figure 1 and studies are listed in Table 1 (for full details, see R.J. Von der Heide, L.M. Skipper and I.R. Olson, submitted for publication). We also performed an empirical study of person memory using famous and personally familiar faces (R.J. Von der Heide, L.M. Skipper and I.R. Olson, submitted for publication). In Figure 1, it can be seen that the activation patterns in the ATL to famous and personally familiar faces are remarkable similar across the ALE brain and the empirical study except that the activations in our empirical study are more ventral. This discrepancy probably reflects the use of conventional EPI imaging techniques in studies included in the ALE analysis that provide little to no signal on the inferior surface of the ATL due to susceptibility artifacts and signal distortion (Devlin *et al.*, 2000). Optimized imaging parameters, such as using a short echo time, must be employed to overcome this problem (Visser *et al.*, 2009).

In macaques, face patches in the ATL are found in the middle temporal gyrus and inferior temporal gyrus extending into the ventral surface (Hadj-Bouziane *et al.*, 2008; Moeller *et al.*, 2008; Ku *et al.*, 2011). In humans, Allison *et al.* recorded from the inferior surface of the human temporal lobe in patients undergoing resection surgery and found that a late event related potential (ERP) termed the P350 localized to the inferior ATL was preferentially sensitive to faces and face priming (Allison *et al.*, 1999; Puce *et al.*, 1999); see also Barbeau *et al.* (2008). Two recent fMRI studies used multivariate techniques to identify a region in the ventral ATL sensitive to face identity changes (Kriegeskorte *et al.*, 2007; Nestor *et al.*, 2011).

These findings predict that ATL damage from resection or disease should impair person memory. In accordance with this, ATL damage from focal injury, epilepsy resection surgery, or from cell loss in the temporal variant of FTD frequently causes person memory deficits that have been termed 'associative prosopagnosia' (Damasio *et al.*, 1990; Evans *et al.*, 1995; Gentileschi *et al.*, 1999; Gainotti *et al.*, 2003; Joubert

*et al.*, 2003; Snowden *et al.*, 2004). Associative prosopagnosia is distinct from the more familiar apperceptive prosopagnosia which is defined by difficulties identifying individuals by visual facial features, and is typically caused by damage to posterior portions of the ventral visual stream in and around the fusiform gyrus. Instead, individuals with associative prosopagnosia have intact face perception so that they typically perform well on difficult fact perception tasks such as the Benton Face Inventory. Their problems arise in associating and retrieving information about the face: who that person is, their name, their relationship to the person and any other biographical details. The particular constellation of deficits can often be predicted by the lateralization of the lesion. Left-lateralized ATL damage commonly impairs the ability to retrieve proper names of familiar (e.g. one's sister) and famous faces (Semenza, 2006) and can impair the ability to learn new face-name associations. Right-lateralized damage usually impairs recognition of famous or personally familiar faces, loss of feelings of familiarity or a failure to recollect person-specific semantic information (Gainotti, 2007a,b). A similar left-right dissociation is observed in FTD (Snowden *et al.*, 2004). Thus, the left ATL appears to be more engaged when people's names must be retrieved, whereas the right ATL mediates between faces and biographical knowledge, which may be a precursor to name retrieval.

There is evidence that the recognition deficits following ATL lesions are not based solely on loss of access to verbal information, such as names. Barton and Cherkasova (2003) required a group of focal lesion patients with various face processing deficits to mentally imagine and answer questions about various famous faces. Mentally imagining Marilyn Monroe's face, for instance, requires the linkage of a name to a face stored in visual long-term memory. The authors found that patients with damage to the fusiform gyrus had poor face recognition abilities but relatively normal facial imagery skills. However, a patient with bilateral ATL lesions had normal face perception but was not able to evoke mental images of famous faces such as Hitler. This finding is from a case study so it must be interpreted cautiously, however, it hints that the ATLs role in person memory extends beyond semantic memory to include the retrieval of visual long-term memories.

The associative prosopagnosia caused by ATL lesions typically gives rise to a multi-modal person identification deficit, probably because such lesions tend to destroy both dorsal and ventral aspects of the ATL. Several lines of evidence indicate that there is sensory specificity in the ATL (reviewed by Skipper *et al.*, 2011). Auditory and visual processing streams remain distinct in the ATL except for in the polar cap and along the STS (Ding *et al.*, 2009) thus it seems likely that vocal identity and facial identity are processed in distinct portions of the ATL. Indeed, vocal identity discrimination is associated with sensitivity in the superior ATL (in the upper bank of the anterior STS) in both humans and monkeys (Belin and Zatorre, 2003; Belin *et al.*, 2004; Andics *et al.*, 2010), while facial identity discrimination is associated with sensitivity in the ventral ATL.

### Specific function of the ventral ATL in person memory

There is a remarkable convergence of findings from PET, fMRI, single-unit recordings in monkeys and humans, and lesion studies all linking the ventral ATL to visual-person-memory functions. Its specific function is in coding facial identity by linking specific faces to semantic, episodic and emotional knowledge. Cells in this region have association formation capabilities. For instance, single neurons in the ventral ATL of monkeys that initially responded to only one abstract pattern would later respond to a second abstract pattern that had been associated via training with the first (Sakai and Miyashita 1991). In addition, cells in the ventral ATL in monkeys can represent an

**Table 1** fMRI studies of person knowledge used in the ALE analysis depicted in Figure 2

| Reference                      | Face stimuli        |        | ATL   |
|--------------------------------|---------------------|--------|-------|
|                                | Personally familiar | Famous |       |
| Arsalidou <i>et al.</i> (2010) | x                   |        | N     |
| Bai <i>et al.</i> (2011)       |                     | x      | Y     |
| Barense <i>et al.</i> (2011)   |                     | x      | Y     |
| Bernard <i>et al.</i> (2004)   |                     | x      | N     |
| Brambati <i>et al.</i> (2010)  |                     | x      | Y     |
| Donix <i>et al.</i> (2010)     | x                   |        | N     |
| Eger <i>et al.</i> (2005)      |                     | x      | Y     |
| Elfgrén <i>et al.</i> (2006)   |                     | x      | Y     |
| Gesierich <i>et al.</i> (2011) |                     | x      | Y     |
| Gobbini <i>et al.</i> (2004)   | x                   | x      | Y     |
| Henson <i>et al.</i> (2003)    |                     | x      | Y     |
| Ishai <i>et al.</i> (2002)     |                     | x      | N     |
| Leveroni <i>et al.</i> (2000)  |                     | x      | Y     |
| Nielson <i>et al.</i> (2010)   |                     | x      | Y     |
| Pourtois <i>et al.</i> (2005)  |                     | x      | Y     |
| Ramon <i>et al.</i> (2010)     | x                   |        | Y     |
| Ross and Olson (2011)          |                     | x      | Y     |
| Rothstein <i>et al.</i> (2005) |                     | x      | Y     |
| Sugiura <i>et al.</i> (2005)   | x                   |        | Y     |
| Sugiura <i>et al.</i> (2011)   | x                   | x      | Y     |
| Trinkler <i>et al.</i> (2009)  | x                   | x      | Y     |
| Turk <i>et al.</i> (2005)      |                     | x      | N     |
| N                              | 7                   | 18     | 17/22 |

Most studies used unfamiliar faces as the baseline task although a few used scrambled or morphed faces (Ishai *et al.*, 2002; Rothstein *et al.*, 2005; Brambati *et al.*, 2010; Gesierich, *et al.*, 2011). The rightmost column indicates whether ATL activations were observed. Note that at least one study (Turk *et al.*, 2005) probably did not have signal coverage in the ATLs.

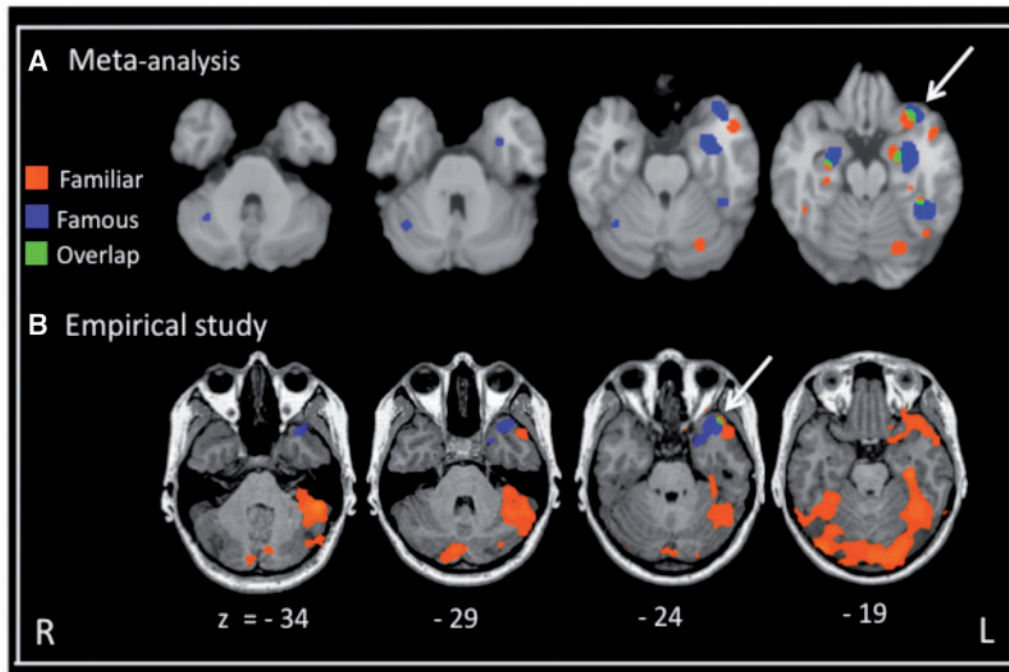

**Fig. 2** (A) Results of an ALE meta-analysis of activations to famous faces (blue), personally familiar faces (red), and their overlap (green; also indicated by arrows). (B) Results of our empirical study of famous and personally familiar faces. In both analyses, the baseline stimulus category was unfamiliar faces (R.J. Von der Heide, L.M. Skipper and I.R. Olson, accepted pending revisions).

associative pairing acquired via training between faces and abstract patterns (Eifuku *et al.*, 2010).

In humans it has been reported that patients with left ATL lesions are unable to form new associations between names and pictures of objects (Sharon *et al.*, 2011). Tsukiura *et al.* (2009) showed that successful encoding of person-related semantics with their names was associated with left ATL activity. The association formation capabilities of the ATL may rely on the hippocampus during the initial encoding phase. Recently, it was shown that 25 h after encoding face-location associations, there was an increase in the functional coupling between the fusiform face area (FFA), spatial representational areas in the posterior parietal cortex and the left ventral ATL (Nieuwenhuis *et al.*, 2011).

It should be mentioned that ATL face patches in monkeys are sensitive to novel and familiar faces (Tsao *et al.*, 2008). This has also been reported in fMRI studies by our laboratory and others (Kriegeskorte *et al.*, 2007; Nestor *et al.*, 2011; R.J. Von der Heide, L.M. Skipper and I.R. Olson, submitted for publication). Based on this, it has also been argued that the ATL is part of a network for perceptual face discrimination (Nestor *et al.*, 2011). The evidence for this idea is complicated. On the one hand, perceptual deficits in face recognition are almost never reported after unilateral ATL resection (reviewed in Olson *et al.*, 2007). On the other hand, cells in monkey ventral ATL respond to some perceptual changes—changes in facial identity—but not to other perceptual changes—such as changes in facial orientation or rotation (Eifuku *et al.*, 2010, 2011). There is also a growing literature suggesting that a small, medial portion of the ATL, called perirhinal cortex, is involved in differentiating complex visual stimuli with many overlapping features, such as faces, but not simpler visual stimuli (Graham *et al.*, 2010).

In sum, the evidence is strong evidence that the ventral ATL has a mnemonic role in person identification and that this process relies on the association formation capacities of cells in this region. Interestingly, portions of the ventral ATL are sensitive to the exact perceptual attributes required for person identification.

### The ATLS and social networks

Since the ventral ATL has an important role in person memory, it would make sense if it also had a role in the maintenance of social networks, a behavior that partly depends on person memory capacity. Kanai *et al.* (2012) reported that the amount of gray matter in the left entorhinal cortex/inferior-medial ATL correlated with the number of Facebook friends. Another group found that gray matter in a more superior portion of the ATL, the left anterior superior ATL, correlated with social network size and theory of mind abilities (Lewis *et al.*, 2011). Intriguingly, an fMRI study of monkeys found that the amount of gray matter volume in the anterior superior ATL, running into the pole, correlated with the size of the social group in which the monkeys were housed (Sallet *et al.*, 2012). In fact, the only brain imaging study of the whole brain that did not report a correlation between social network size and ATL gray matter volume was by Bickart *et al.* (2010).

### Neuroimaging studies of high-level social cognition

The last piece of evidence linking the ATL to social processing is from neuroimaging. A large number of studies investigating various aspects of social cognition, such as theory of mind, have reported activations in the dorsal and polar ATL (reviewed by Olson *et al.*, 2007; Simmons and Martin, 2009; Wong and Gallate, 2012). For instance, we showed study participants Heider and Simmel social attribution stimuli (Heider and Simmel, 1944) or similar non-social moving stimuli and asked them to make judgments about friendliness or weight. Social activations were found along both banks of the STS extending into the pole (Ross and Olson, 2010). Other laboratories have reported nearly identical findings (Castelli *et al.*, 2000; Saffran *et al.*, 2003; Schultz *et al.*, 2003; Ohnishi *et al.*, 2004). A range of theory of mind manipulations, such as presenting brief vignettes or cartoons about theory of mind, also activate the ATL; see Figure 3.

Other high-level social tasks evoke activations in the ATL as well: moral judgments (Moll *et al.*, 2005), social vs non-social gestures

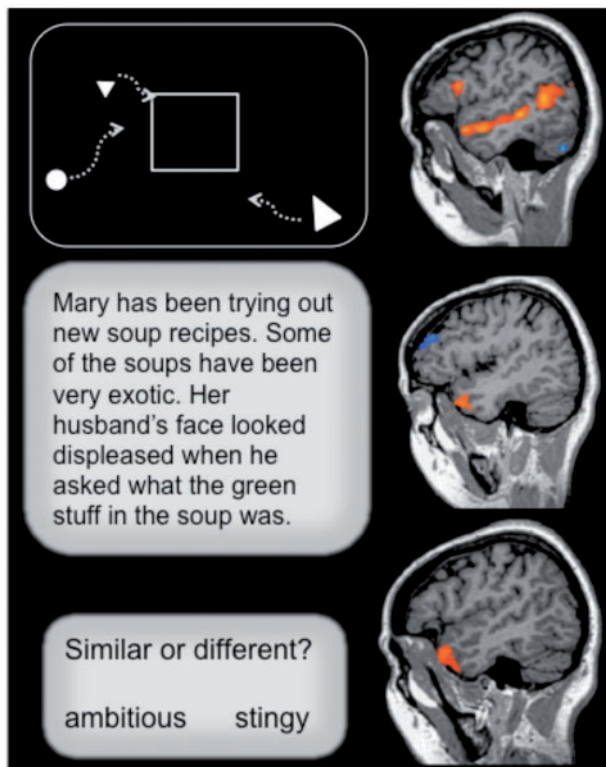

**Fig. 3** Task and fMRI activations from (Ross and Olson, 2010). From top to bottom: Heider and Simmel (1944) social attribution task (baseline task had same low-level visual characteristics but lacked the impression of animacy and biological motion); a verbal theory of mind task (baseline task had the same task demands, contained the same number of words, and contained proper nouns but lacked a theory of mind element); a semantic comparison task (baseline task required the comparison of two non-social words that were matched to the social words on many psycholinguistic variables).

(Straube *et al.*, 2010), socio-emotional stories (Ferstl and von Cramon, 2002), music believed to be composed by a human *vs* a computer (Steinbeis and Koelsch, 2009) and sounds evoking a social scene such as footsteps (Saarela and Hari, 2008).

What is striking about these findings is the large variation in stimuli and tasks that all evoke activations in the ATL. The consistency of ATL activations to high-level social tasks has led to its inclusion in the ‘social brain network’ outlined by Frith and Frith (2003, 2010); however, its precise role in this network has not been clearly elucidated. This is because the common underlying cognitive component that relates these tasks to one another remains obscure. In the next section, we discuss why we think the ATL’s particular role in social cognition is encoding and retrieving social concepts.

### Semantic memory and the ATL: the social knowledge hypothesis

Semantic memory, also referred to as conceptual knowledge, refers to knowledge of objects, word meaning, facts and people without reference to a particular time or place (Tulving, 1972). For instance, knowing that the Eiffel Tower is located in Paris is an instance of semantic memory. Remembering your trip to see it is an instance of episodic memory. One influential view of ATL function proposes that this region serves as an amodal ‘hub’ for semantic memory (Patterson *et al.*, 2007). As such, this region serves to link together sensory specific and semantic associations located throughout the brain (McClelland and Rogers, 2003; Patterson *et al.*, 2007). Evidence for this view is drawn primary from studies of patients with semantic dementia, mentioned earlier. Patients with this disorder have semantic deficits that

are characterized by amodal receptive and expressive semantic deficits in response to pictures, words, sounds and even olfactory information (Bozeat *et al.*, 2000; Coccia *et al.* 2004; Luzzi *et al.*, 2007); reviewed by Patterson *et al.* (2007).

A central contention of the Hub Account is that the ATL is more sensitive to specific, rather than general semantic information retrieval. For instance, some studies have shown that semantic dementia patients’ success or failure on any given semantic test is in part determined by the specificity of information required by the task (Rogers and Patterson, 2007). Hodges *et al.* tested a semantic dementia patient on a simple picture naming task four times over the course of 2 years. Over time the patient’s name for the same picture became less specific and crossed larger category boundaries. For instance, when shown a rooster at the first testing session, the patient named it as a ‘chicken.’ In subsequent sessions, he could only name it as a ‘bird’ and finally labeled the picture as a ‘dog’ (Hodges *et al.*, 1995). A socially important type of specific information—the names of friends and family—is one of the earliest types of knowledge lost in semantic dementia (Hodges *et al.*, 1995) and is frequently described as a loss of specific-level processing (Patterson *et al.*, 2007).

The problem with this example is that socialness is confounded with semantic specificity. We contrasted the effects of socialness and specificity in two fMRI experiments (L.M. Skipper and I.R. Olson, submitted for publication) using different types of stimuli (pictorial and verbal), and different tasks. We found a strong effect of social content in the ATL. This region was highly active in response to pictures of people, words that name people and words that describe personality traits. However there was no region within the ATL that was sensitive to specific level information, even at extremely liberal thresholds. Thus, our findings failed to replicate the ATL findings of an earlier PET study (Rogers *et al.*, 2006). Instead, specificity effects were observed in the *posterior* inferior temporal lobes and inferior occipital lobes, a finding that partially replicates a prior neuroimaging study of semantic specificity (Tyler *et al.*, 2004).

There are other findings that are also problematic for the specificity contention of the Hub Account. First, five of the six neuroimaging studies that are typically cited (e.g. (Patterson *et al.*, 2007) in support of the ATL-semantic specificity link used social stimuli: familiar faces, proper names or familiar voices (Gorno-Tempini *et al.*, 1998; Gorno-Tempini and Price, 2001; Nakamura *et al.*, 2001; Tsukiura *et al.*, 2006) so again, specificity and social factors are confounded. Second, it is possible that difficulties retrieving highly specific information is actually due to a different, correlated factor: atypicality/uncommonness. In one study, patients with semantic dementia were required to name and classify exemplars of different categories of knowledge. The patients had greatest difficulty naming atypical members of categories such as hairless cats (Mayberry *et al.*, 2011).

Aside from the specificity problem, there are other challenges to general semantic accounts of the ATL, like the Hub Account. First, it is not clear that a semantic hub is necessary for semantic processing (Simmons and Martin, 2009; Simmons *et al.*, 2010). Second, evidence for general semantic functions of the ATL is overwhelmingly drawn from studies of patients with semantic dementia, who have cell loss in regions outside of the ATL. Finally, ATL activations are not evident across the majority of fMRI studies on semantic memory (Visser *et al.*, 2009). A comprehensive meta-analysis of the neuroimaging literature found that the most commonly activated region in studies of general semantic memory was the left angular gyrus (Binder *et al.*, 2009).

### Social concepts and the ATL

The information presented in the last section argues for a revision to the dominant view—the Hub Account—of the functionality of the ATL.

Here, we propose two revisions: (i) that the ATL is not a general-purpose semantic processor. Instead, portions of the ATL are particularly involved in processing concepts with social-emotional content; and (ii) that the ATL is not an amodal semantic processor. Instead, it contains distinct sensory subdivisions. We note that this later point is not controversial among anatomists, having been reported in several studies (Kondo *et al.*, 2003; Ding *et al.*, 2009; Blaizot *et al.*, 2010).

A wealth of findings reviewed earlier (see also Moll *et al.*, 2005; Zahn *et al.*, 2007; Zahn *et al.*, 2009; Ross and Olson, 2010, 2011; L.M. Skipper and I.R. Olson, submitted for publication) support the view that the ATL is involved in encoding and retrieving social concepts. Canonical concepts in this category would be concepts about people—personality traits, proper names, biographical information, etc. However, other seemingly non-social concepts may be processed by this region because they have personal significance and emotional tone. For instance, both the physical appearance and the particular ring tone of my iPhone can evoke the concept of ‘my iPhone’. However, that concept is also attached to several emotions—feelings of familiarity, possessiveness and affection. Other objects, such as a particular vase, may not have any personal significance so the social knowledge hypothesis would predict that the ATL is not required to retrieve the conceptual information linked to that particular vase.

The social knowledge hypothesis makes several predictions. First, social concepts should preferentially activate portions of the ATL. Zahn *et al.* (2007) tested this by comparing brain activations while subjects made semantic similarity judgments of two separate classes of lexical stimuli. The first class of lexical stimuli was words describing positive (honor—brave) or negative (tactless—impolite) human social concepts. The second class of word stimuli described behaviors related to animal use and biological function (nutritious—useful) that can, in principle, apply to humans as well. Words of each class were presented in pairs and the task was to judge whether the words were semantically related or not. The results showed that a small region of the superior ATL was sensitive to social concepts (Zahn *et al.*, 2007). Our laboratory replicated these findings (Ross and Olson, 2010). Similarly, patients with FTD who have cell loss in the right superior ATL exhibit disproportionate impairments in understanding social concepts compared to other abstract, but non-social concepts (Zahn *et al.*, 2009). We recently found that verbal information about personality traits activates the superior-polar ATL (L.M. Skipper and I.R. Olson, submitted for publication).

A second prediction is that tasks requiring the processing and retrieval of social concepts should show overlapping activations in the ATL, even when the tasks are substantially different in design, stimulus quality and task demands. We recently tested this by comparing the functional overlap between perceptually and cognitively distinct tasks whose only commonality was a social component (Ross and Olson, 2010). One task was verbal and highly semantic, using social word stimuli such as ‘friendly’. Another task was visual, using film clips of geometric objects interacting in either a social or nonsocial manner (see Figure 3). The results showed that these tasks elicited overlapping activations in the left superior ATL.

A third prediction is that non-social objects should activate the ATL when they are imbued with social-emotional meaning. We tested this by training subjects to associate social or non-social adjectives with novel objects. In the scanner, the task was to look at the object and recall the associated adjective. Associated with social traits were found to preferentially activate the ATL (Skipper *et al.*, 2011).

Fourth, it is known that cells in monkey ATL, and thus presumably human ATL, can quickly form associations between faces and other stimuli (Eifuku *et al.*, 2010, 2011). This predicts that the ATL should be sensitive to the association between people and traits. One example of

this is a stereotype—a culturally held belief about specific groups of people. At the heart of most stereotypes is a strong association between certain types of people and specific personality or behavioral traits.

A small number of studies have linked the ATL to stereotyping. In two separate studies, Gallate and colleagues found that inhibiting the left or right ATL by applying repetitive transcranial magnetic stimulation (TMS) decreases implicit stereotyping as measured by the implicit association task (IAT). This task measures the associative strength between two conceptual categories such as ‘women’ and ‘math’. The TMS effects were specific to the social version of the task suggesting that the ATLs are more sensitive to associations about people than to associations about things (Gallate *et al.*, 2011; Wong *et al.*, 2012). It has also been reported that IAT performance is perturbed after ATL damage and that affective trait associations between verbal information and faces fails to occur when the temporal pole and amygdala are damaged (Gozzi *et al.*, 2009; Toderov and Olson, 2008). One fMRI study reported that the retrieval of stereotypic knowledge, as compared to other types of conceptual knowledge, activated the ATL along with other regions commonly recruited in social cognition tasks such as medial prefrontal cortex (Contreras *et al.*, 2012). Even more tellingly, David Amodio’s laboratory asked Caucasian study participants to classify pairs of Black or White faces according to a friendship judgment (e.g. Which of these two people would you more likely befriend?) or a trait judgment (e.g. Which of these two people is likely to be more athletic?) while being scanned. Activations in the left ATL correlated with a behavioral measure of bias during the friendship judgments and also a behavioral measure of stereotyping during the trait judgments (Gilbert *et al.*, 2012).

### Selectivity of the superior ATL for high-level social information

The ATL is discussed in three distinct literatures: sentence processing, semantic memory and social cognition. This raised the question of whether the superior ATL subregion commonly reported in theory of mind, morality, and social word processing is selective for social information? The evidence does not permit us to state that this region is modular and only sensitive to social concepts, especially since the ATL is most likely comprised of several distinct substructures. However, the reviewed evidence makes it quite clear that portions of the ATL show greater sensitivity to social concepts than similar non-social concepts. Indeed, it is rare to observe ATL activations in the absence of social cues. For instance, although ATL activations are frequently reported in studies of sentence processing (Hickok and Poeppel, 2007), most of the sentence stimuli used in these studies are about people, while the comparison condition is usually word strings. Even the processing of stimuli that is only implicitly social, such as the sound of human footsteps, activates the ATL (Saarela and Hari, 2008). In sum, portions of the ATL are more sensitive to social stimuli than other types of stimuli that have been tested. However, it is premature to state that it is completely selective for social concepts.

### CONCLUSIONS AND OPEN QUESTIONS

It has been argued that primates’ social groups are so distinct from those of other species because of their ability to use complex forms of social knowledge to predict the behavior of others and to manipulate others (Cheney and Seyfarth, 2007). The neural basis of such knowledge has received little attention. In this article, we reviewed evidence showing that portions of the ATL are involved in encoding and representing social knowledge. In an earlier review of this literature, we proposed that the ATL’s associate highly processed perceptual information with emotional information to form a personal semantic store (Olson *et al.*, 2007). In this review, we elaborated on this idea and discussed additional findings supporting this contention.

To summarize the data supporting the ATL's involvement in social memory:

- (i) The ATL appears to have a role in affiliative behaviors that underlie group formation. Bilateral ATL damage in humans and monkeys leads to changes in these behaviors.
- (ii) The ATL has a critical role in person memory as supported by findings from neuropsychology, electrophysiology and neuroimaging. There are two important axes of functionality: left-right lateralization and dorsal-ventral sensory processing. The left ATL is associated with proper name retrieval, the right with feelings of familiarity and retrieval of biographical information. The dorsal ATL is associated with identification of particular individual's voices, the ventral ATL with the identification of particular individual's faces.
- (iii) The ventral ATL has a role in person memory at both encoding and retrieval. The encoding function is based on the ability of cells in this region to rapidly associate faces with other pieces of information including affective tone.
- (iv) The superior-polar ATL is involved in more abstract forms of social processing, such as theory of mind. Its functional role may be to encode and retrieve social concepts including trait information that are required to understand social behavior, derive social meaning and maintain social bonds in an ever-changing social landscape. Polar aspects of the ATL are highly interconnected with two neuromodulatory regions, the amygdala and the hypothalamus (Kondo *et al.*, 2003, 2005) which may serve to tag salient or relevant information, making it easier to retrieve later on (Adolphs, 2010).

The *social knowledge hypothesis* of ATL function reconciles the extensive literatures on general semantic processing (Patterson *et al.*, 2007) and imaging studies in social cognition that have implicated the ATLs as part of the 'social brain' (Moll *et al.*, 2005; Olson *et al.*, 2007; Frith and Frith, 2010). Previously, it was proposed that the ATL's role in social cognition is to process social scripts or schemas (Frith and Frith, 2003); however, we believe the data better support the social knowledge hypothesis. Several questions remain unanswered however.

First, is the ATL inherently sensitive to social knowledge or, instead, does this type of information receive prioritized processing due to its inherent salience (Wong and Gallate, 2012)? Social stimuli may be a canonical class of salient concepts to social animals. We favor this view as it is very parsimonious, it affords the ATL a greater role in conceptual processing, and it accounts for a wider range of findings. It is plausible that the ATL would be sensitive to seemingly non-social concepts that have personal significance and emotional tone. By this token, naming of famous landmarks may be impaired following ATL damage (reviewed by (Tranel, 2009)) and famous landmarks may activate the ATL (e.g. Ross and Olson, 2011; R.J. Von der Heide, L.M. Skipper and I.R. Olson, submitted for publication), because these seemingly neutral items have become social and emotional by shared cultural consensus. The Eiffel Tower is not just a lattice tower made of iron. It symbolizes a country (France), a key destination for world travelers and the idea of French romance (Ross and Olson, 2011). Many of us have emotional memories of visiting the Eiffel Tower. Some everyday objects such as laptop computers could also be imbued with emotion (I adore my Mackintosh laptop) to the degree that the emotional value is part-and-parcel of the conceptual meaning of that object.

Second, what is the relationship between language and social processing? As noted by Syal and Finley (2011), social motivation is a necessary requirement for normal language acquisition. In addition, the content of human communication is primarily social information such as gossip (Dunbar, 1996; Mesoudi *et al.*, 2006), which raises the

question of whether language evolved to support social processing. Interestingly, the ATLs have been implicated not only in social processing but also in higher-order aspects of language, such as sentence processing and semantic memory.

Third, many of the findings relating high-level social processing, such as theory of mind, to the ATL implicate superior-polar regions. In non-human primates, the superior ATL, but not inferior ATL, contains cells that are responsive to social-emotional stimuli (Kondo *et al.*, 2003). The polar tip contains bidirectional connections with medial and orbital regions of the frontal lobe, implicating this region in high-level social processing (reviewed by (Moran *et al.*, 1987)). Whether the face sensitivity on the inferior surface is more closely aligned with high-level visual processing than with more general social processing *per se* is not known.

Finally, we would like to offer a speculation as to the relationship between the ventral ATL, the orbitofrontal cortex and the amygdala. We begin with the argument that was first stated by others—that memories are useful only to the degree that they help make advantageous decisions (Murray and Izquierdo, 2007). Take the example of person memories. As we discussed earlier, the ventral ATL contains neurons that can make rapid associations between faces and other stimuli (Eifuku *et al.*, 2010), potentially forming our storehouse of biographic information. The amygdala and hypothalamus may interact with the ventral ATL to give these person-based memories emotional tone. However at this stage, the memories are static and useless because there is no way for them to guide decision making. This step occurs through an interaction of the ventral ATL with lateral orbitofrontal cortex via the uncinate fasciculus. The orbitofrontal cortex is thought to represent expected outcomes such as the size and probability of reward combined with the effort that must be expended to achieve it (Padoa-Schioppa and Assad, 2006; Murray and Izquierdo, 2007). The orbitofrontal cortex uses a particular type of affect (that associated with reward and punishment) to guide decision making between multiple competing stimuli (Murray and Izquierdo, 2007). For instance, if you need to decide who to trust with a secret—Marian or Rebecca—the action of the orbitofrontal cortex would allow you to make an optimal choice based on past experiences with Marian and Rebecca stored in the ventral ATL. The reciprocal relationship between the ATL–orbitofrontal cortex–amygdala complex allows the positive or negative outcome of this decision to be stored in the ATL as part of the biographic memories of Marian and Rebecca.

This view predicts that bilateral ATL damage should cause a type of 'associative social agnosia' where inappropriate behavior and perhaps a reduction in interest arises because social entities, social behaviors and social terms, are stripped of rich, personal meaning. In contrast, focal orbitofrontal lesions should lead to a pattern of behavior characterized by intact social knowledge but impaired utilization of such knowledge.

There is some evidence for this prediction. ATL damage or atrophy can cause loss of person knowledge (reviewed in Gainotti, 2007a; Olson *et al.*, 2007), hypoemotionality to visual stimuli (as in Klüver-Bucy Syndrome) and deficient understanding of social words compared with non-social words (Zahn *et al.*, 2009). It has also been reported that adult patients with acquired sociopathy due to orbitofrontal damage have intact knowledge of social rules and norms, though they are unable (or unwilling) to use this knowledge to guide decision making (Saver and Damasio, 1991). Interestingly, three studies have reported that the structure that links the ATL to orbitofrontal cortex, the uncinate fasciculus, is less organized in psychopaths or people with antisocial personality disorder compared with matched controls (Craig *et al.*, 2009; Motzkin *et al.*, 2011; Sundram *et al.*, 2012). These findings suggest that the ATL and its connectivity to other limbic regions may have an important role in modulating higher-level social behaviors.



## REFERENCES

- Adolphs, R. (2010). What does the amygdala contribute to social cognition? *Annals of the New York Academy of Sciences*, 1191(1), 42–61.
- Allison, A.C. (1954). The secondary olfactory areas in the human brain. *Journal of Anatomy*, 88(4), 481–8.
- Allison, T., Puce, A., Spencer, D.D., McCarthy, G. (1999). Electrophysiological studies of human face perception. I: potentials generated in occipitotemporal cortex by face and non-face stimuli. *Cerebral Cortex*, 9(5), 415–30.
- Andics, A., McQueen, J.M., Petersson, K.M., Gal, V., Rudas, G., Vidnyanszky, Z. (2010). Neural mechanisms for voice recognition. *NeuroImage*, 52(4), 1528–40.
- Arsalidou, M., Barbeau, E.J., Bayless, S.J., Taylor, M.J. (2010). Brain responses differ to faces of mothers and fathers. *Brain Cognition*, 74(1), 47–51.
- Bai, H.-M., Wang, W.-M., Li, T.-D., Liu, Y., Lu, Y.-C. (2011). Functional MRI mapping of category-specific sites associated with naming of famous faces, animals, and man-made objects. *Neuroscience Bulletin*, 27(5), 307–18.
- Barbeau, E., Taylor, M.J., Regis, J., Chauvel, P., Liegeois-Chauvel, C. (2008). Spatio-temporal dynamics of face recognition. *Cerebral Cortex*, 18, 997–1009.
- Barese, M.D., Henson, R.N.A., Graham, K.S. (2011). Perception and conception: temporal lobe activity during complex discriminations of familiar and novel faces and objects. *Journal of Cognitive Neuroscience*, 23, 1–16.
- Barton, J.J., Cherkasova, M. (2003). Face imagery and its relation to perception and covert recognition in prosopagnosia. *Neurology*, 61(2), 220–5.
- Belin, P., Fecteau, S., Bedard, C. (2004). Thinking in voice: Neural correlates of voice perception. *Trends in Cognitive Science*, 8(3), 129–35.
- Belin, P., Zatorre, R.J. (2003). Adaptation to speaker's voice in right anterior temporal lobe. *NeuroReport*, 14(16), 2105–9.
- Bernard, F.A., Bullmore, E.T., Graham, K.S., Thompson, S.A., Hodges, J.R., Fletcher, P.C. (2004). The hippocampal region is involved in successful recognition of both remote and recent famous faces. *NeuroImage*, 22, 1704–14.
- Bickart, K., Wright, C.I., Dautoff, R.J., Dickerson, B.C., Feldman Barrett, L. (2010). Amygdala volume and social networks in humans. *Nature Neuroscience*, 14(2), 163–4.
- Binder, J.R., Desai, R.H., Graves, W.W., Conant, L.L. (2009). Where is the semantic system? A critical review and meta-analysis of 120 functional neuroimaging studies. *Cerebral Cortex*, 19, 2767–96.
- Blaizot, X., Mansilla, F., Insausti, A.M., et al. (2010). The human parahippocampal region: I. Temporal pole cytoarchitectonic and MRI correlation. *Cerebral Cortex*, 20(9), 2198–212.
- Bozeat, S., Lambon Ralph, M.A., Patterson, K., Garrard, P., Hodges, J.R. (2000). Non-verbal semantic impairment in semantic dementia. *Neuropsychologia*, 38(9), 1207–15.
- Brambati, S.M., Benoit, S., Monetta, L., Belleville, S., Joubert, S. (2010). The role of the left anterior temporal lobe in the semantic processing of famous faces. *NeuroImage*, 53, 674–81.
- Bucher, K., Myers, R.E., Southwick, C. (1970). Anterior temporal cortex and maternal behavior in monkey. *Neurology*, 20(4), 415.
- Caramazza, A., Shelton, J.R. (1998). Domain-specific knowledge systems in the brain: the animate-inanimate distinction. *Journal of Cognitive Neuroscience*, 10(1), 1–34.
- Castelli, F., Happe, F., Frith, U., Frith, C. (2000). Movement and mind: A functional imaging study of perception and interpretation of complex intentional movement patterns. *NeuroImage*, 12(3), 314–325.
- Cheney, D.L., Seyfarth, R.M. (2007). *Baboon Metaphysics: The Evolution of a Social Mind*. Chicago: The University of Chicago Press.
- Coccia, M., Bartolini, M., Luzzi, S., Provinciali, L., Lambon Ralph, M.A. (2004). Semantic memory is an amodal, dynamic system: evidence from the interaction of naming and object use in semantic dementia. *Cognitive Neuropsychology*, 21(5), 513–27.
- Contreras, J.M., Banaji, M.R., Mitchell, J.P. (2012). Dissociable neural correlates of stereotypes and other forms of semantic knowledge. *Social Cognitive Affective Neuroscience*, 7, 764–770.
- Craig, M.C., Catani, M., Deeley, Q., et al. (2009). Altered connections on the road to psychopathy. *Molecular Psychiatry*, 14(10), 946–53, 907.
- Damasio, A.R., Tranel, D., Damasio, H. (1990). Face agnosia and the neural substrates of memory. *Annual Review of Neuroscience*, 13, 89–109.
- de Schotten, M.T., Dell'Acqua, F., Valabregue, R., Catani, M. (2012). Monkey to human comparative anatomy of the frontal lobe association tracts. *Cortex*, 48(1), 82–96.
- Devlin, J.T., Russell, R.P., Davis, M.H., et al. (2000). Susceptibility-induced loss of signal: comparing PET and fMRI on a semantic task. *NeuroImage*, 11(6), 589–600.
- Ding, S.L., Van Hoesen, G.W., Cassell, M.D., Poremba, A. (2009). Parcellation of human temporal polar cortex: a combined analysis of multiple cytoarchitectonic, chemoarchitectonic, and pathological markers. *Journal of Computational Neurology*, 514(6), 595–623.
- Donix, M., Petrowski, K., Jurjan, L., et al. (2010). Age and the neural network of personal familiarity. *PLoS ONE*, 5, e15790.
- Dunbar, R. (1996). *Grooming, Gossip, and the Evolution of Language*. Cambridge, MA: Harvard University Press.
- Edwards-Lee, T., Miller, B.L., Benson, D.F., et al. (1997). The temporal variant of frontotemporal dementia. *Brain*, 120(6), 1027–40.
- Eger, E., Schweinberger, S.R., Dolan, R.J., Henson, R.N. (2005). Familiarity enhances invariance of face representations in human ventral visual cortex: fMRI evidence. *NeuroImage*, 26, 1128–39.
- Eifuku, S., De Souza, W.C., Nakata, R., Ono, T., Tamura, R. (2011). Neural representations of personally familiar and unfamiliar faces in the anterior inferior temporal cortex of monkeys. *PLoS ONE*, 6(4), e18913.
- Eifuku, S., Nakata, R., Sugimori, M., Ono, T., Tamura, R. (2010). Neural correlates of associative face memory in the anterior inferior temporal cortex of monkeys. *Journal of Neuroscience*, 30(45), 15085–96.
- Elfgren, C., van Westen, D., Passant, U., Larsson, E.M., Mannfolk, P., Fransson, P. (2006). fMRI activity in the medial temporal lobe during famous face processing. *NeuroImage*, 30(2), 609–16.
- Evans, J.J., Heggs, A.J., Antoun, N., Hodges, J.R. (1995). Progressive prosopagnosia associated with selective right temporal lobe atrophy. A new syndrome? *Brain*, 118(1), 1–13.
- Ferstl, E.C., von Cramon, D.Y. (2002). What does the frontomedian cortex contribute to language processing: coherence or theory of mind? *NeuroImage*, 17(3), 1599–612.
- Franzen, E.A., Myers, R.E. (1973). Neural control of social behavior: prefrontal and anterior temporal cortex. *Neuropsychologia*, 11(2), 141–57.
- Frith, U., Frith, C. (2010). The social brain: Allowing humans to boldly go where no other species has been. *Philosophical Transactions of the Royal Society B: Biological Sciences*, 365(1537), 165–75.
- Frith, U., Frith, C.D. (2003). Development and neurophysiology of mentalizing. *Philosophical Transactions of the Royal Society of London B Biological Sciences*, 358(1431), 459–73.
- Gainotti, G. (2007a). Different patterns of famous people recognition disorders in patients with right and left anterior temporal lesions: a systematic review. *Neuropsychologia*, 45(8), 1591–607.
- Gainotti, G. (2007b). Face familiarity feelings, the right temporal lobe, and the possible underlying neural mechanisms. *Brain Research Reviews*, 56(1), 214–35.
- Gainotti, G., Barbier, A., Marra, C. (2003). Slowly progressive defect in recognition of familiar people in a patient with right anterior temporal atrophy. *Brain*, 126(4), 792–803.
- Gallate, J., Wong, C., Ellwood, S., Chi, R., Snyder, A. (2011). Noninvasive brain stimulation reduces prejudice scores on an implicit association test. *Neuropsychology*, 25, 185–192.
- Gentileschi, V., Sperber, S., Spinnler, H. (1999). Progressive defective recognition of familiar people. *Neurocase*, 5(5), 407–24.
- Gerstenbrand, F., Poewe, W., Aichner, F., Saltuari, L. (1983). Klüver-Bucy syndrome in man: experiences with posttraumatic cases. *Neuroscience and Biobehavioral Reviews*, 7(3), 413–17.
- Gesierich, B., Jovicich, J., Riello, M., et al. (2012). Distinct neural substrates for semantic knowledge and naming in the temporoparietal network. *Cerebral Cortex*, 22, 2217–2226.
- Ghashghaie, H.T., Barbas, H. (2002). Pathways for emotion: interactions of prefrontal and anterior temporal pathways in the amygdala of the rhesus monkey. *Neuroscience*, 115(4), 1261–79.
- Ghika-Schmid, F., Assal, G., De Tribolet, N., Regli, F. (1995). Klüver-Bucy syndrome after left anterior temporal resection. *Neuropsychologia*, 33(1), 101–13.
- Gilbert, S.J., Swencionis, J.K., Amodio, D.M. (2012). Evaluative vs. trait representation in intergroup social judgments: Distinct roles of anterior temporal lobe and prefrontal cortex. *Neuropsychologia*, 50, 3600–3611.
- Gobbini, M.I., Leibenluft, E., Santiago, N., Haxby, J.V. (2004). Social and emotional attachment in the neural representation of faces. *NeuroImage*, 22(4), 1628–35.
- Gorno-Tempini, M.L., Price, C.J. (2001). Identification of famous faces and buildings: a functional neuroimaging study of semantically unique items. *Brain*, 124(Pt 10), 2087–97.
- Gorno-Tempini, M.L., Price, C.J., Josephs, O., et al. (1998). The neural systems sustaining face and proper-name processing. *Brain*, 121(Pt 11), 2103–18.
- Gozzi, M., Raymond, V., Solomon, J., Koenigs, M., Grafman, J. (2009). Dissociable effects of prefrontal and anterior temporal cortical lesions on stereotypical gender attitudes. *Neuropsychologia*, 47, 2125–2132.
- Graham, K.S., Barese, M.D., Lee, A.C.H. (2010). Going beyond LTM in the MTL: a synthesis of neuropsychological and neuroimaging findings on the role of the medial temporal lobe in memory and perception. *Neuropsychologia*, 48(4), 831–53.
- Hadj-Bouziene, F., Bell, A.H., Knusten, T.A., Ungerleider, L.G., Tootell, R.B. (2008). Perception of emotional expressions is independent of face selectivity in monkey inferior temporal cortex. *Proceedings of the National Academy of Sciences of the United States of America*, 105(14), 5591–6.
- Heider, F., Simmel, M. (1944). An experimental study of apparent behaviour. *American Journal of Psychology*, 57(2), 243–59.
- Henson, R.N., Goshen-Gottstein, Y., Ganel, T., Otten, L.J., Quayle, A., Rugg, M.D. (2003). Electrophysiological and haemodynamic correlates of face perception, recognition and priming. *Cerebral Cortex*, 13, 793–805.
- Hickok, G., Poeppel, D. (2007). The cortical organization of speech processing. *Nature Reviews Neuroscience*, 8(5), 393–402.
- Hodges, J.R., Graham, N., Patterson, K. (1995). Charting the progression of semantic dementia: implications for the organization of semantic memory. *Memory*, 3, 463–96.
- Hodges, J.R., Patterson, K. (2007). Semantic dementia: a unique clinicopathological syndrome. *Lancet Neurology*, 6(11), 1004–14.

- Insausti, R., Amaral, D.G., Cowan, W.M. (1987). The entorhinal cortex of the monkey: III. Subcortical afferents. *Journal of Comparative Neurology*, 264(3), 396–408.
- Ishai, A., Haxby, J.V., Ungerleider, L.G. (2002). Visual imagery of famous faces: effects of memory and attention revealed by fMRI. *NeuroImage*, 17, 1729–41.
- Joubert, S., Felician, O., Barbeau, E., et al. (2003). Impaired configurational processing in a case of progressive prosopagnosia associated with predominant right temporal lobe atrophy. *Brain*, 126(11), 2537–50.
- Kanai, R., Bahrami, B., Roylance, R., Rees, G. (2012). Online social network size is reflected in human brain structure. *Proceedings of the Royal Society of London*, 279(1732), 1327–34.
- Kipps, C.M., Hodges, J.R., Fryer, T.D., Nestor, P.J. (2009). Combined magnetic resonance imaging and positron emission tomography brain imaging in behavioural variant frontotemporal degeneration: refining the clinical phenotype. *Brain*, 132(9), 2566–78.
- Kling, A., Steklis, H.D. (1976). A neural substrate for affiliative behavior in nonhuman primates. *Brain, Behavior and Evolution*, 13(2–3), 216–38.
- Kling, A.S., Tachiki, K., Lloyd, R. (1993). Neurochemical correlates of the Klüver-Bucy syndrome by in vivo microdialysis in monkey. *Behavioral Brain Research*, 56(2), 161–70.
- Klüver, H., Bucy, P.C. (1937). “Psychic blindness” and other symptoms following bilateral temporal lobectomy in rhesus monkeys. *American Journal of Physiology*, 119, 352–3.
- Kondo, H., Saleem, K.S., Price, J.L. (2003). Differential connections of the temporal pole with the orbital and medial prefrontal networks in macaque monkeys. *Journal of Comparative Neurology*, 465(4), 499–523.
- Kondo, H., Saleem, K.S., Price, J.L. (2005). Differential connections of the perirhinal and parahippocampal cortex with the orbital and medial prefrontal networks in macaque monkeys. *Journal of Comparative Neurology*, 493(4), 479–509.
- Kriegeskorte, N., Formisano, E., Sorger, B., Goebel, R. (2007). Individual faces elicit distinct response patterns in human anterior temporal cortex. *Proceedings of the National Academy of Sciences of the United States of America*, 104(51), 20600–5.
- Ku, S.-P., Tolia, A., Logothetis, N.K., Goense, J. (2011). fMRI of the face-processing network in the temporal lobe of awake and anesthetized monkeys. *Neuron*, 70(2), 353–62.
- Lebreton, M., Barnes, A., Miettunen, J., et al. (2009). The brain structural disposition to social interaction. *European Journal of Neuroscience*, 29(11), 2247–52.
- Leveroni, C.L., Seidenberg, M., Mayer, A.R., Mead, L.A., Binder, J.R., Rao, S.M. (2000). Neural Systems Underlying the Recognition of Familiar and Newly Learned Faces. *Journal of Neuroscience*, 20, 878–86.
- Lewis, P.A., Rezaie, R., Brown, R., Roberts, N., Dunbar, R.I.M. (2011). Ventromedial prefrontal volume predicts understanding of others and social network size. *NeuroImage*, 57(4), 1624–9.
- Luzzi, S., Snowden, J.S., Neary, D., Coccia, M., Provinciali, L., Lambon Ralph, M.A. (2007). Distinct patterns of olfactory impairment in Alzheimer’s disease, semantic dementia, frontotemporal dementia, and corticobasal degeneration. *Neuropsychologia*, 45(8), 1823–31.
- Martin, A. (2009). *Circuits in Mind: The Neural Foundations for Object Concepts in the Cognitive Neurosciences* 4th edn. Cambridge, MA: MIT Press.
- Mayberry, E.J., Sage, K., Lambdon Ralph, M.A. (2011). At the edge of semantic space: breakdown of coherent concepts in semantic dementia is constrained by typicality and severity but not modality. *Journal of Cognitive Neuroscience*, 23, 2240–51.
- McClelland, J.L., Rogers, T.T. (2003). The parallel distributed processing approach to semantic cognition. *Nature Reviews Neuroscience*, 4(4), 310–22.
- McIntosh, A.M., Maniega, S.M., Lymer, G.K., et al. (2008). White matter tractography in bipolar disorder and schizophrenia. *Biological Psychiatry*, 64(12), 1088–92.
- Mendez, M.F., Chen, A.K., Shapira, J.S., Po-Huang, L., Miller, B.L. (2006). Acquired ex-troversion associated with bitemporal variant of frontotemporal dementia. *Journal of Neuropsychiatry and Clinical Neuroscience*, 18(1), 100–7.
- Mesoudi, A., Whiten, A., Dunbar, R. (2006). A bias for social information in human cultural transmission. *The British Psychological Society*, 97(3), 405–23.
- Mesulam, M.M., editor (2000). Paralimbic (mesocortical) areas. *Principles of Behavioral and Cognitive Neurology*. New York: Oxford University Press, pp. 49–54.
- Mion, M., Patterson, K., Acosta-Cabronero, J., et al. (2010). What the left and right anterior fusiform gyri tell us about semantic memory. *Brain*, 133(11), 3256–68.
- Moeller, S., Freiwald, W.A., Tszo, D.Y. (2008). Patches with Links: A unified system for processing faces in the macaque temporal lobe. *Science*, 320(5881), 1355–9.
- Moll, J., de Oliveira-Souza, R., Moll, F.T., et al. (2005). The moral affiliations of disgust: A functional MRI study. *Cognitive Behavioral Neurology*, 18(1), 68–78.
- Moran, M.A., Mufson, E.J., Mesulam, M.M. (1987). Neural inputs into the temporopolar cortex of the rhesus monkey. *The Journal of Comparative Neurology*, 256(1), 88–103.
- Morecraft, R.J., Geula, C., Mesulam, M.M. (1992). Cytoarchitecture and neural afferents of orbitofrontal cortex in the brain of the monkey. *Journal of Comparative Neurology*, 323, 341–58.
- Motzkin, J.C., Newman, J.P., Kiehl, K.A., Koenigs, M. (2011). Reduced prefrontal connectivity in psychopathy. *Journal of Neuroscience*, 31(48), 17348–57.
- Murray, E., Izquierdo, A. (2007). Orbitofrontal cortex and amygdala contributions to affect and action in primates. *Annals of the New York Academy of Sciences*, 1121, 273–96.
- Mychack, P., Kramer, J.H., Boone, K.B., Miller, B.L. (2001). The influence of right frontotemporal dysfunction on social behavior in frontotemporal dementia. *Neurology*, 56(11), 11–5.
- Myers, R.E. (1975). Neurology of social behavior and affect in primates: a study of prefrontal and anterior temporal cortex. In: Zuelch, K.J., Creutzfeldt, O., Galbraith, G., editors. *Cerebral Localization*. New York: Springer-Verlag, pp. 161–170.
- Myers, R.E., Swett, C. (1970). Social behavior deficits of free-ranging monkeys after anterior temporal cortex removal: a preliminary report. *Brain Research*, 18, 551–6.
- Nakamura, K., Kawashima, R., Sugiura, M., et al. (2001). Neural substrates for recognition of familiar voices: a PET study. *Neuropsychologia*, 39(10), 1047–54.
- Neary, D., Snowden, J.S., Gustafson, L., et al. (1998). Frontotemporal lobar degeneration: A consensus on clinical diagnostic criteria. *Neurology*, 51(6), 1546–54.
- Nestor, A., Plaut, D.C., Behrmann, M. (2011). Unraveling the distributed neural code of facial identity through spatiotemporal pattern analysis. *Proceedings of the National Academy of Sciences of the United States of America*, 108(24), 9998–10003.
- Nielson, K.A., Seidenberg, M., Woodard, J.L., et al. (2010). Common neural systems associated with the recognition of famous faces and names: an event-related fMRI study. *Brain and Cognition*, 72(3), 491–8.
- Nieuwenhuis, I.L.C., Takashima, A., Oostenveld, R., McNaughton, B.L., Fernandez, G., Jensen, O. (2012). The neocortical network representing associative memory reorganizes with time in a process engaging the anterior temporal lobe. *Cerebral Cortex*, 22, 2622–2633.
- Ohnishi, T., Moriguchi, Y., Matsuda, H., et al. (2004). The neural network for the mirror system and mentalizing in normally developed children: an fMRI study. *Neuroreport*, 15(9), 1483–7.
- Olson, I.R., Plotzker, A., Ezzyat, Y. (2007). The Enigmatic temporal pole: a review of findings on social and emotional processing. *Brain*, 130(7), 1718–31.
- Padoa-Schioppa, C., Assad, J.A. (2006). Neurons in the orbitofrontal cortex encode economic value. *Nature*, 441, 223–6.
- Patterson, K., Nestor, P.J., Rogers, T.T. (2007). Where do you know what you know? The representation of semantic knowledge in the human brain. *Nature Review Neuroscience*, 8(12), 976–87.
- Pickens, C.L., Sadoris, M.P., Setlow, B., Gallagher, M., Holland, P.C., Schoenbaum, G. (2003). Different roles for orbitofrontal cortex and basolateral amygdala in a reinforcer devaluation task. *J Neurosci*, 23(35), 11078–84.
- Pourtois, G., Schwartz, S., Seghier, M.L., Lazeyras, F., Vuilleumier, P. (2005). View-independent coding of face identity in frontal and temporal cortices is modulated by familiarity: an event-related fMRI study. *NeuroImage*, 24, 1214–1224.
- Price, J.L., editor (1990) *Olfactory System*. San Diego: Academic Press.
- Puce, A., Allison, T., McCarthy, G. (1999). Electrophysiological studies of human face perception. III: effects of top-down processing on face-specific potentials. *Cerebral Cortex*, 9(5), 445–58.
- Ramon, M., Dricot, L., Rossion, B. (2010). Personally familiar faces are perceived categorically in face-selective regions other than the fusiform face area. *European Journal of Neuroscience*, 32, 1587–98.
- Rankin, K.P., Kramer, J.H., Mychack, P., Miller, B.L. (2003). Double dissociation of social functioning in frontotemporal dementia. *Neurology*, 60(2), 266–71.
- Rogers, T.T., Hocking, J., Noppeney, U., et al. (2006). Anterior temporal cortex and semantic memory: Reconciling findings from neuropsychology and functional imaging. *Cognitive Affective and Behavioral Neuroscience*, 6(3), 201–13.
- Rogers, T.T., Patterson, K. (2007). Object categorization: Reversals and explanations of the basic level advantage. *Journal of Experimental Psychology: General*, 136, 451–69.
- Ross, L.A., Olson, I.R. (2010). Social cognition and the anterior temporal lobes. *NeuroImage*, 49(4), 3452–62.
- Ross, L.A., Olson, I.R. (2012). What’s unique about unique entities? An fMRI investigation of the semantics of famous faces and landmarks. *Cerebral Cortex*, 22, 2005–15.
- Rothstein, P., Henson, R.A., Treves, A., Driver, J., Dolan, R.J. (2005). Morphing Marilyn into Maggie dissociates physical and identity face representations in the brain. *Nature Neuroscience*, 8, 107–13.
- Sarella, M.V., Hari, R. (2008). Listening to humans walking together activates the social brain circuitry. *Social Neuroscience*, 3(3–4), 401–9.
- Saffran, E.M., Coslett, H.B., Martin, N., Boronat, C.B. (2003). Access to knowledge from pictures but not words in a patient with progressive fluent aphasia. *Language and Cognitive Processes*, 18(5–6), 725–57.
- Sakai, K., Miyashita, Y. (1991). Neural organization for the long-term memory of paired associates. *Nature*, 354(6349), 152–5.
- Sallet, J., Mars, R.B., Noonan, M.P., et al. (2012). Social network size affects neural circuits in macaques. *Science*, 334(6056), 697–700.
- Saver, J.L., Damasio, A.R. (1991). Preserved access and processing of social knowledge in a patient with acquired sociopathy due to ventromedial frontal damage. *Neuropsychologia*, 29(12), 1241–9.
- Schultz, R.T., Grelotti, D.J., Klin, A., et al. (2003). The role of the fusiform face area in social cognition: implications for the pathobiology of autism. *Philosophical Transactions of the Royal Society of London B Biological Sciences*, 358(1430), 415–27.
- Semenza, C. (2006). Retrieval pathways for common and proper names. *Cortex*, 42(6), 884–91.
- Sergent, J., Ohta, S., Macdonald, B. (1992). Functional neuroanatomy of face and object processing: A positron emission tomography study. *Brain*, 115(1), 15–36.
- Sharon, T., Moscovitch, M., Gilboa, A. (2011). Rapid neocortical acquisition of long-term arbitrary associations independent of the hippocampus. *Proceedings of the National Academy of Sciences of the United States of America*, 108(3), 1146–51.

- Simmons, W.K., Martin, A. (2009). The anterior temporal lobes and the functional architecture of semantic memory. *Journal of the International Neuropsychological Society*, 15(5), 645–9.
- Simmons, W.K., Reddish, M., Bellgowan, P.S.F., Martin, A. (2010). The selectivity and functional connectivity of the anterior temporal lobes. *Cerebral Cortex*, 20(4), 813–25.
- Skipper, L.M., Ross, L.A., Olson, I.R. (2011). Sensory and semantic category subdivisions within the anterior temporal lobes. *Neuropsychologia*, 49(12), 3419–29.
- Snowden, J.S., Thompson, J.C., Neary, D. (2004). Knowledge of famous faces and names in semantic dementia. *Brain*, 127(4), 860–72.
- Sollberger, M., Stanley, C.M., Wilson, S.M., et al. (2009). Neural basis of interpersonal traits in neurodegenerative diseases. *Neuropsychologia*, 47(13), 2812–27.
- Steinbeis, N., Koelsch, S. (2009). Understanding the intentions behind man-made products elicits neural activity in areas dedicated to mental state attribution. *Cerebral Cortex*, 19(3), 619–23.
- Straube, B., Green, A.J., Jansen, A., Chatterjee, A., Kircher, T. (2010). Social cues, mentalizing and the neural processing of speech accompanied by gestures. *Neuropsychologia*, 48(2), 382–93.
- Sugiura, M., Kawashima, R., Nakamura, K., et al. (2001). Activation reduction in anterior temporal cortices during repeated recognition of faces of personal acquaintances. *Neuroimage*, 13(5), 877–90.
- Sugiura, M., Mano, Y., Sasaki, A., Sadato, N. (2011). Beyond the memory mechanism: person selective and nonselective processes in recognition of personally familiar faces. *Journal of Cognitive Neuroscience*, 23, 699–715.
- Sugiura, M., Watanabe, J., Maeda, Y., Matsue, Y., Fukuda, H., Kawashima, R. (2005). Cortical mechanisms of visual self-recognition. *NeuroImage*, 24, 143–9.
- Sundram, F., Deeley, Q., Sarkar, S., et al. (2012). White matter microstructural abnormalities in the frontal lobe of adults with antisocial personality disorder. *Cortex*, 48(2), 216–29.
- Suzuki, W.A., Amaral, D.G. (1994). Perirhinal and parahippocampal cortices of the macaque monkey: cortical afferents. *Journal of Comparative Neurology*, 350(4), 497–533.
- Syal, S., Finlay, B.L. (2011). Thinking outside the cortex: Social motivation in the evolution and development of language. *Developmental Science*, 14(2), 417–30.
- Terzian, H., Dalle Ore, G. (1955). Syndrome of Klüver and Bucy, reproduced in man by bilateral removal of the temporal lobes. *Neurology*, 5, 373–80.
- Todorov, A., Olson, I.R. (2008). Robust learning of affective trait associations with faces when the hippocampus is damaged, but not when the amygdala and temporal pole are damaged. *Social Cognitive Affective Neuroscience*, 3, 195–203.
- Tranel, D. (2009). The left temporal pole is important for retrieving words for unique concrete entities. *Aphasiology*, 23(7 & AMP), 867.
- Trinkler, I., King, J.A., Doeller, C.F., Rugg, M.D., Burgess, N. (2009). Neural bases of autobiographical support for episodic recollection of faces. *Hippocampus*, 19(8), 718–30.
- Tsao, D., Moeller, S., Freiwald, W.A. (2008). Comparing face patch systems in macaques and humans. *Proceedings of the National Academy of Sciences of the United States of America*, 105(49), 19514–9.
- Tsukiura, T., Mano, Y., Sekiguchi, A., et al. (2009). Dissociable roles of the anterior temporal regions in successful encoding of memory for person identity information. *Journal of Cognitive Neuroscience*, 22(10), 2226–37.
- Tsukiura, T., Mochizuki-Kawai, H., Fujii, T. (2006). Dissociable roles of the bilateral anterior temporal lobe in face-name associations: an event-related fMRI study. *Neuroimage*, 30(2), 617–26.
- Tulving, E. (1972). *Organisation of Memory*. Cambridge, MA: MIT Press.
- Turk, D.J., Rosenblum, A.C., Gazzaniga, M.S., Macrae, C.N. (2005). Seeing John Malkovich: the neural substrates of person categorization. *NeuroImage*, 24, 1147–53.
- Turkeltaub, P.E., Eden, G.F., Jones, K.M., Zeffiro, T.A. (2002). Meta-analysis of the functional neuroanatomy of single-word reading: method and validation. *Neuroimage*, 16(3), 765–80.
- Tyler, L.K., Stamatakis, E.A., Bright, P., et al. (2004). Processing objects at different levels of specificity. *Journal of Cognitive Neuroscience*, 16, 351–62.
- Visser, M., Jefferies, E., Lambon, R.M.A. (2009). Semantic processing in the anterior temporal lobes: a meta-analysis of the functional neuroimaging literature. *Journal of Cognitive Neuroscience*, 22(6), 1083–94.
- von Economo, C. (1929). *The Cytoarchitectonics of the Human Cerebral Cortex*. London: Oxford University Press.
- Wong, C., Gallate, J. (2012). The function of the anterior temporal lobe: A review of the empirical evidence. *Brain Research*, 1449, 94–116.
- Zahn, R., Moll, J., Krueger, F., Huey, E.D., Garrido, G., Grafman, J. (2007). Social concepts are represented in the superior anterior temporal cortex. *Proceedings of the National Academy of Sciences of the United States of America*, 104(15), 6430–5.
- Zahn, R., Moll, J., Paiva, M., et al. (2009). The neural basis of human social values: evidence from functional MRI. *Cerebral Cortex*, 19(2), 276–83.
